# Supplementary material for: Two additional midline barriers function with midlinelefty1expression to maintain asymmetric Nodal signaling during left-right axis specification in zebrafish
Source: Oxford University Press journal article supplement (doi:10.1242/dev.071092), 2011-09-21
Supplement: dev071092tables1.pdf [file dev071092tables1.pdf]

**Table S1. D/V patterning defects in Z and MZ *bmp4* mutants**

| Genotype                            | Wild type (%) | Ventral fin defect (%) | Ventral fin and cloaca defect (%) | <i>n</i> |
|-------------------------------------|---------------|------------------------|-----------------------------------|----------|
| Z <i>bmp4</i> Y180*/+ IX            | 91            | 8                      | 1                                 | 772      |
| Z <i>bmp4</i> S355*/+ IX            | 71            | 25                     | 4                                 | 284      |
| Z <i>bmp4</i> C365S/+ IX            | 80            | 19                     | 1                                 | 718      |
| MZ <i>bmp4</i> Y180* <sup>-/-</sup> | 0             | 77                     | 23                                | 426      |
| MZ <i>bmp4</i> S355* <sup>-/-</sup> | 61            | 35                     | 4                                 | 344      |
| MZ <i>bmp4</i> C365S <sup>-/-</sup> | 38            | 59                     | 3                                 | 281      |

Presence and morphology of the ventral fin and correct development of the cloaca (Esterberg et al., 2008; Stickney et al., 2007) were scored in Z and MZ *bmp4* mutants. Percentages for zygotic in-crosses contain both mutant and sibling populations. Morphological defects are not completely penetrant in mutants and are partially dominant in the S355\* and C365S alleles.

#### Additional reference

**Esterberg, R., Delalande, J. M. and Fritz, A.** (2008). Tailbud-derived Bmp4 drives proliferation and inhibits maturation of zebrafish chordamesoderm. *Development* **135**, 3891-3901.
