# Supplementary material for: Two additional midline barriers function with midlinelefty1expression to maintain asymmetric Nodal signaling during left-right axis specification in zebrafish
Source: Oxford University Press journal article supplement (doi:10.1242/dev.071092), 2011-09-21
Supplement: dev071092tables2.pdf [file dev071092tables2.pdf]

**Table S2. Effects of mutant and WT *bmp4* mRNA injections**

| RNA               | Concentration (pg) | Normal (%) | Phenotype <sup>†</sup> |       |    |                 |     | <i>n</i> |
|-------------------|--------------------|------------|------------------------|-------|----|-----------------|-----|----------|
|                   |                    |            | Dorsalized (%)         |       |    | Ventralized (%) |     |          |
|                   |                    |            | C1                     | C2-C3 | C4 | V3              | V4  |          |
| Uninjected        | 0                  | 100        | 0                      | 0     | 0  | 0               | 0   | 30       |
| <i>bmp4</i> WT    | 50                 | 0          | 0                      | 0     | 0  | 2               | 98  | 87       |
| <i>bmp4</i> Y180* | 50                 | 100        | 0                      | 0     | 0  | 0               | 0   | 180      |
| <i>bmp4</i> S355* | 50                 | 96         | 1                      | 3     | 0  | 0               | 0   | 97       |
| <i>bmp4</i> C365S | 50                 | 72         | 13                     | 13    | 2  | 0               | 0   | 208      |
| <i>bmp4</i> WT    | 100                | 0          | 0                      | 0     | 0  | 0               | 100 | 84       |
| <i>bmp4</i> Y180* | 100                | 100        | 0                      | 0     | 0  | 0               | 0   | 101      |
| <i>bmp4</i> S355* | 100                | 86         | 2                      | 8     | 4  | 0               | 0   | 183      |
| <i>bmp4</i> C365S | 100                | 59         | 16                     | 16    | 9  | 0               | 0   | 74       |

To test whether mutant *bmp4* RNAs would retain activity we carried out overexpression assays. D/V patterning defects were scored in wild-type (WT) embryos injected with WT and mutant *bmp4* RNAs.

<sup>†</sup>Phenotypes are classified according to previously determined designations for degrees of dorsalization and ventralization (Kishimoto et al., 1997; Neave et al., 1997; Weber et al., 2008). C1, only the ventral tail fin is reduced; C2-C3, curled and progressive loss of tail; C4, head structure visible on yolk; C5, most extreme class with no posterior or ventral structures; V3, tissue at either end of the yolk; V4, most extreme class with disrupted epiboly.
