# Supplementary material for: Two additional midline barriers function with midlinelefty1expression to maintain asymmetric Nodal signaling during left-right axis specification in zebrafish
Source: Oxford University Press journal article supplement (doi:10.1242/dev.071092), 2011-09-21
Supplement: dev071092tables3.pdf [file dev071092tables3.pdf]

**Table S3. Organ laterality phenotypes in Z and MZ *bmp4* mutants**

| Genotype                 | Situs inversus <sup>†</sup>    |     | Heterotaxia <sup>§</sup> (%) | <i>n</i> |
|--------------------------|--------------------------------|-----|------------------------------|----------|
|                          | Situs solitus <sup>†</sup> (%) | (%) |                              |          |
| Z <i>bmp4</i> Y180*/+ IX | 99                             | 0   | 1                            | 162      |
| Z <i>bmp4</i> S355*/+ IX | 99                             | 0   | 1                            | 83       |
| Z <i>bmp4</i> C365S/+ IX | 98                             | 2   | 0                            | 352      |
| MZ <i>bmp4</i> Y180*-/-  | 89                             | 7   | 4                            | 152      |
| MZ <i>bmp4</i> S355*-/-  | 99                             | 1   | 0                            | 148      |
| MZ <i>bmp4</i> C365S-/-  | 100                            | 0   | 0                            | 94       |

Positions of the heart, liver and pancreas were determined for Z and MZ *bmp4* mutants at 48 hpf by RNA in situ hybridization.

Because zygotic mutants cannot be consistently identified by morphology, percentages for zygotic in-crosses contain both mutant and phenotypically wild-type siblings.

<sup>†</sup>Embryos with correct organ placement.

<sup>§</sup>Embryos with complete reversals in organ placement.

<sup>§</sup>Embryos with random positioning of organs about the L/R axis.
